# Supplementary material for: Green Aromatic Epoxidation with an Iron Porphyrin Catalyst for One-Pot Functionalization of Renewable Xylene, Quinoline, and Acridine
Source: MDPI journal article supplement (doi:10.3390/molecules28093940), 2023-05-07
Supplement: s1 [file s1]

# Green Aromatic Epoxidation with an Iron Porphyrin Catalyst for One-Pot Functionalization of Renewable Xylene, Quinoline, and Acridine

Gabriela A. Corrêa, Susana L. H. Rebelo \* and Baltazar de Castro

LAQV/REQUIMTE, Departamento de Química e Bioquímica, Faculdade de Ciências, Universidade do Porto, Rua do Campo Alegre s/n, 4169-007 Porto, Portugal

\* Correspondence: susana.rebelo@fc.up.pt

## Table of contents

|                                                                   |    |
|-------------------------------------------------------------------|----|
| 1. Additional characterization of <i>o</i> -Xylene products ..... | 2  |
| 1.1. Compound 1a .....                                            | 2  |
| 1.2. Compound 1b .....                                            | 2  |
| 2. Additional characterization of quinoline products .....        | 5  |
| 2.1. Compounds 2a .....                                           | 5  |
| 2.2. Compounds 2b and 2c .....                                    | 7  |
| 3. NMR spectra of a quinoline total reaction mixture .....        | 10 |
| 4. Additional characterization of acridine products .....         | 12 |
| 4.1. Compound 3a and 3b .....                                     | 12 |
| 5. Catalyst stability studies .....                               | 13 |

## 1. Additional characterization of *o*-Xylene products

### 1.1. Compound 1a

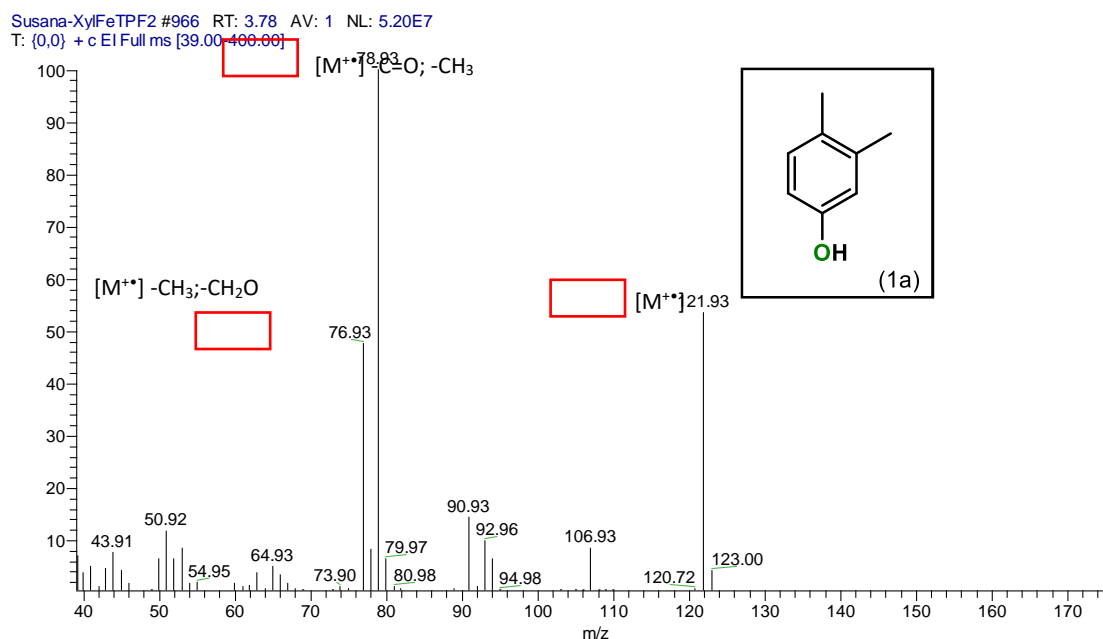

Figure S1. MS spectrum (EI) of product **1a** obtained from GC-MS analysis of *o*-Xylene oxidation reaction.

### 1.2 Compound 1b

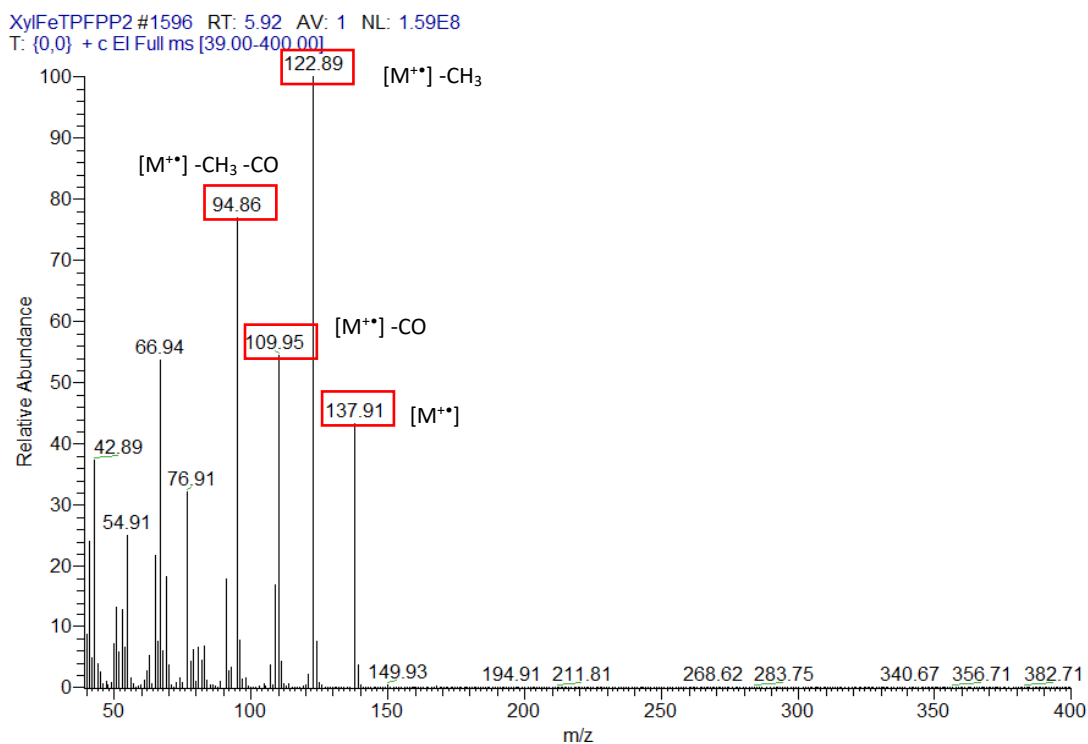

Figure S2. MS spectrum (EI) of product **1b** obtained from GC-MS analysis of *o*-Xylene oxidation reaction.

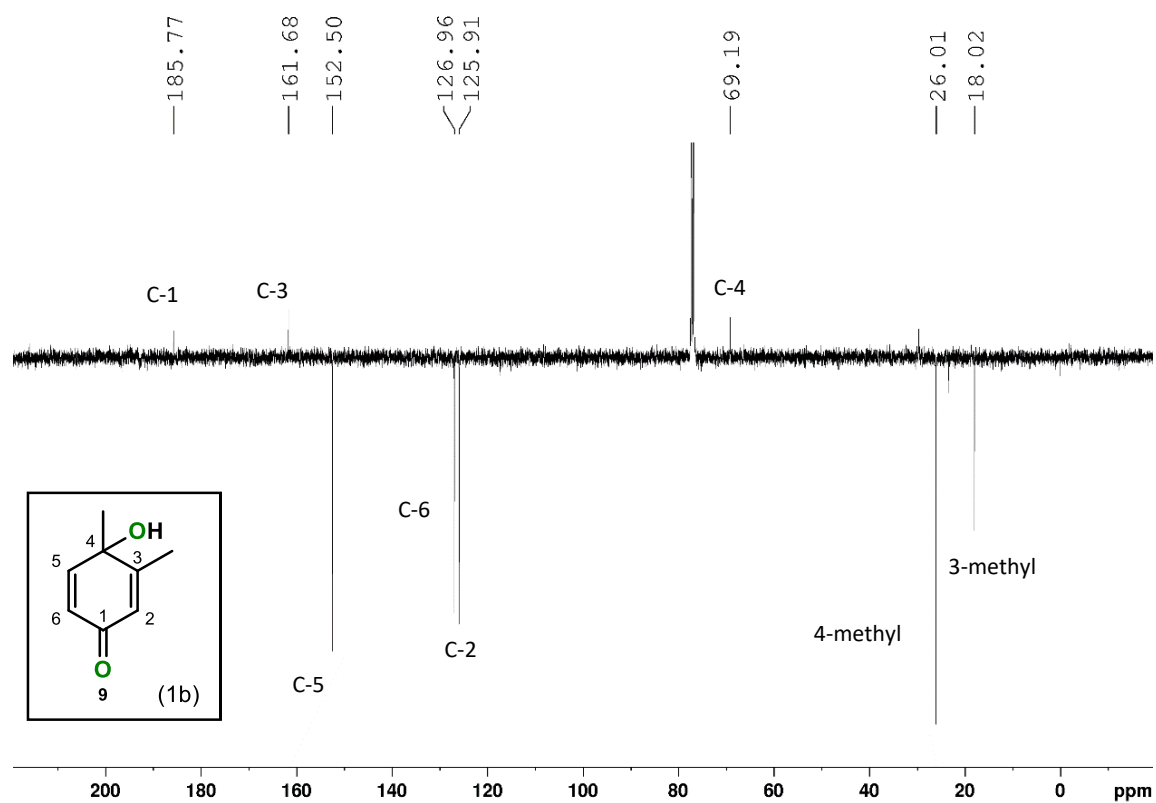

Figure S3. APT spectrum for product **1b** in  $\text{CDCl}_3$ .

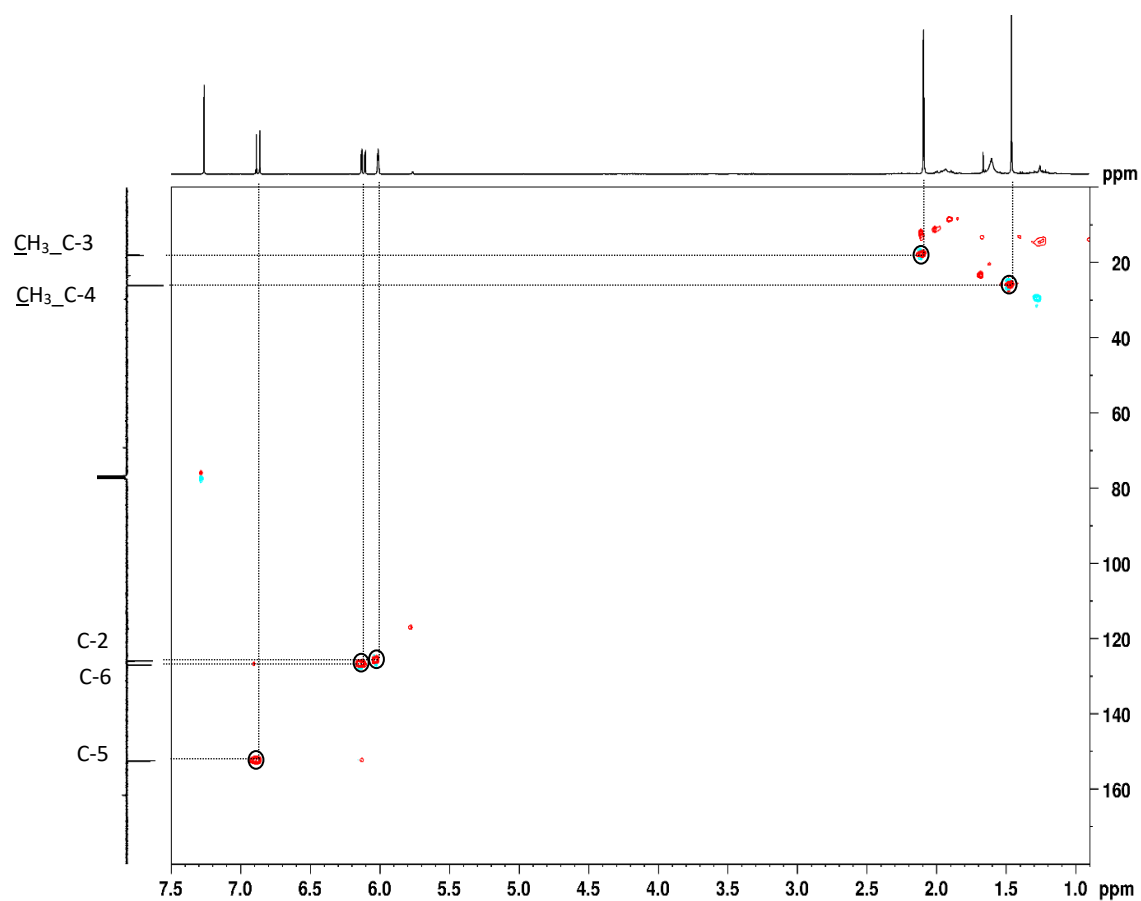

**Figure S4.** HSQC spectrum for product **1b** in  $\text{CDCl}_3$ .

## 2. Additional characterization of quinoline products

### 2.1. Compounds 2a

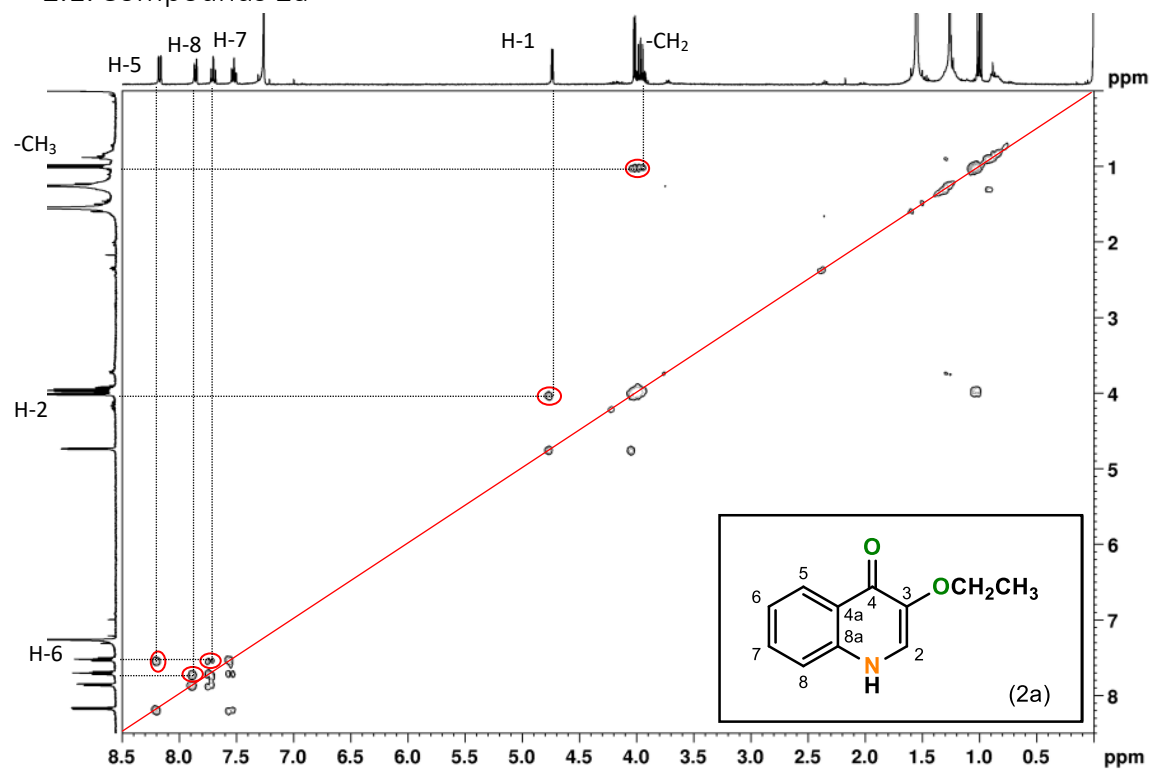

**Figure S5.** COSY spectrum from product **2a** in CDCl<sub>3</sub>.

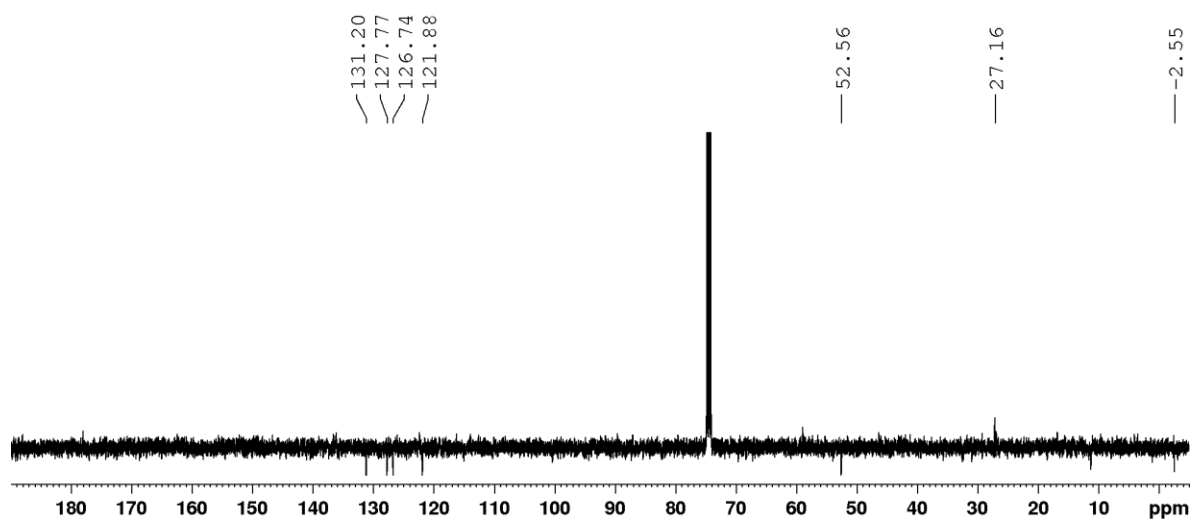

**Figure S6.** APT spectrum from product **2a** in  $\text{CDCl}_3$ . Mesomerism present in the aza-ring justifies the low intensity of related signals relatively to the signals of the phenyl ring.

2.2. Compounds **2b** and **2c**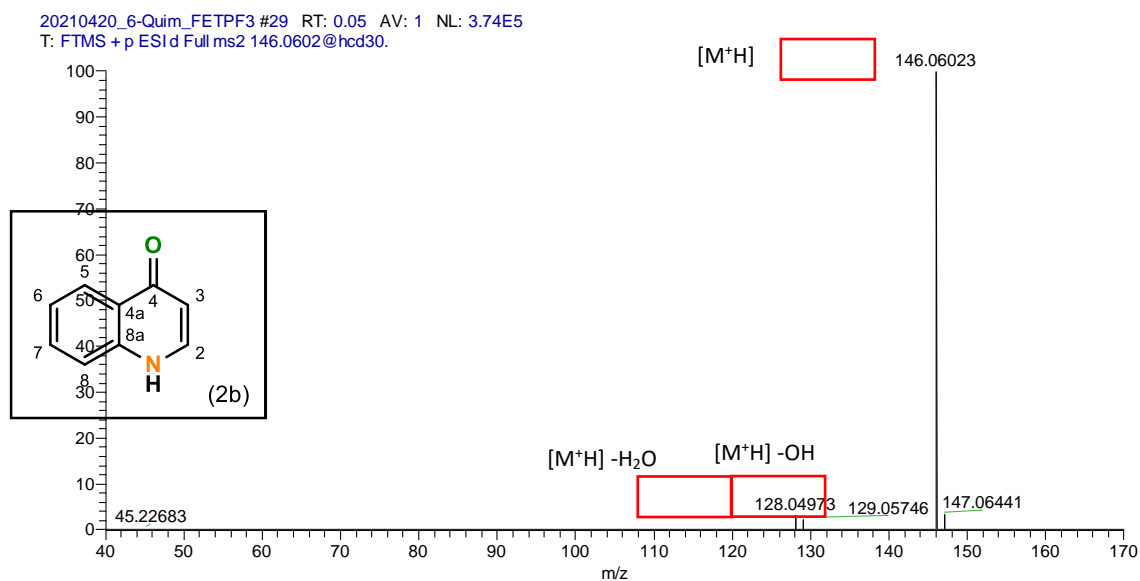

**Figure S7.** HR-MS<sup>2</sup> (ESI) spectrum from molecular ion corresponding to product **2b** at  $m/z$  146.

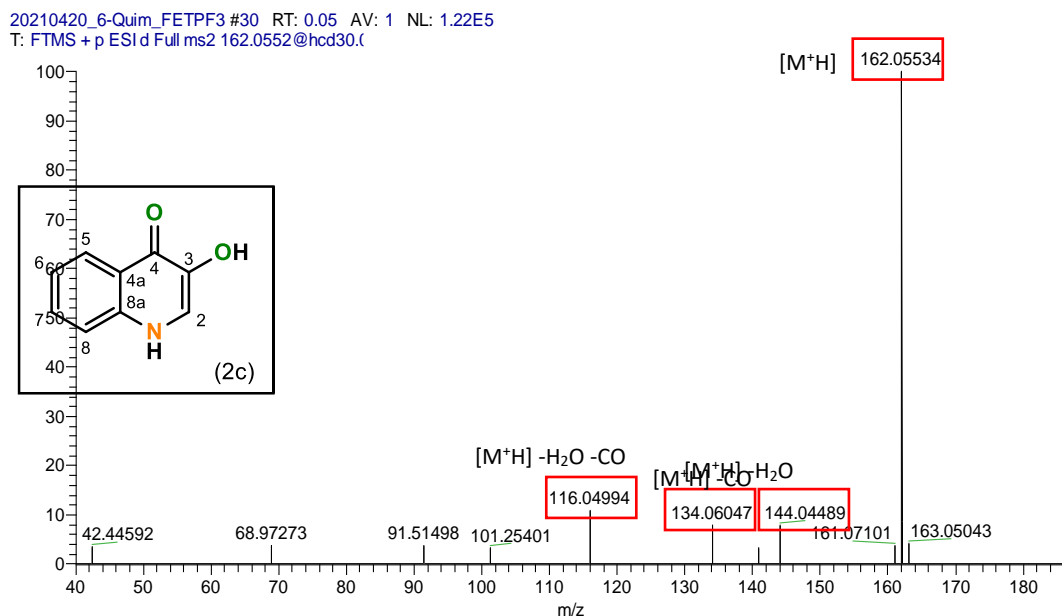

**Figure S8.** HR-MS<sup>2</sup> (ESI) spectrum from molecular ion corresponding to product **2c** at  $m/z$  162.

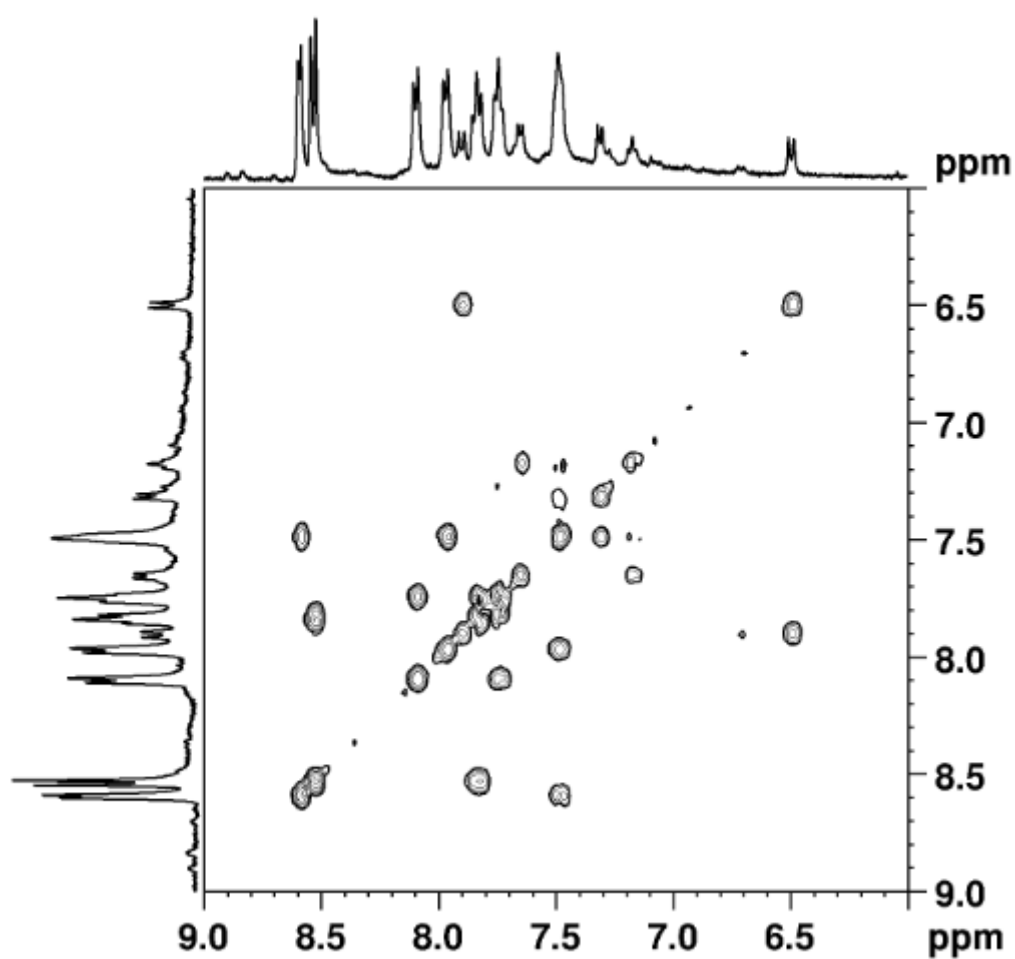

**Figure S9.** Amplified COSY spectrum in DMSO-d<sub>6</sub> of a TLC fraction from a quinoline oxidation reaction under Path II. Compounds **2b**, **2b\*** and **2c\*** were identified.



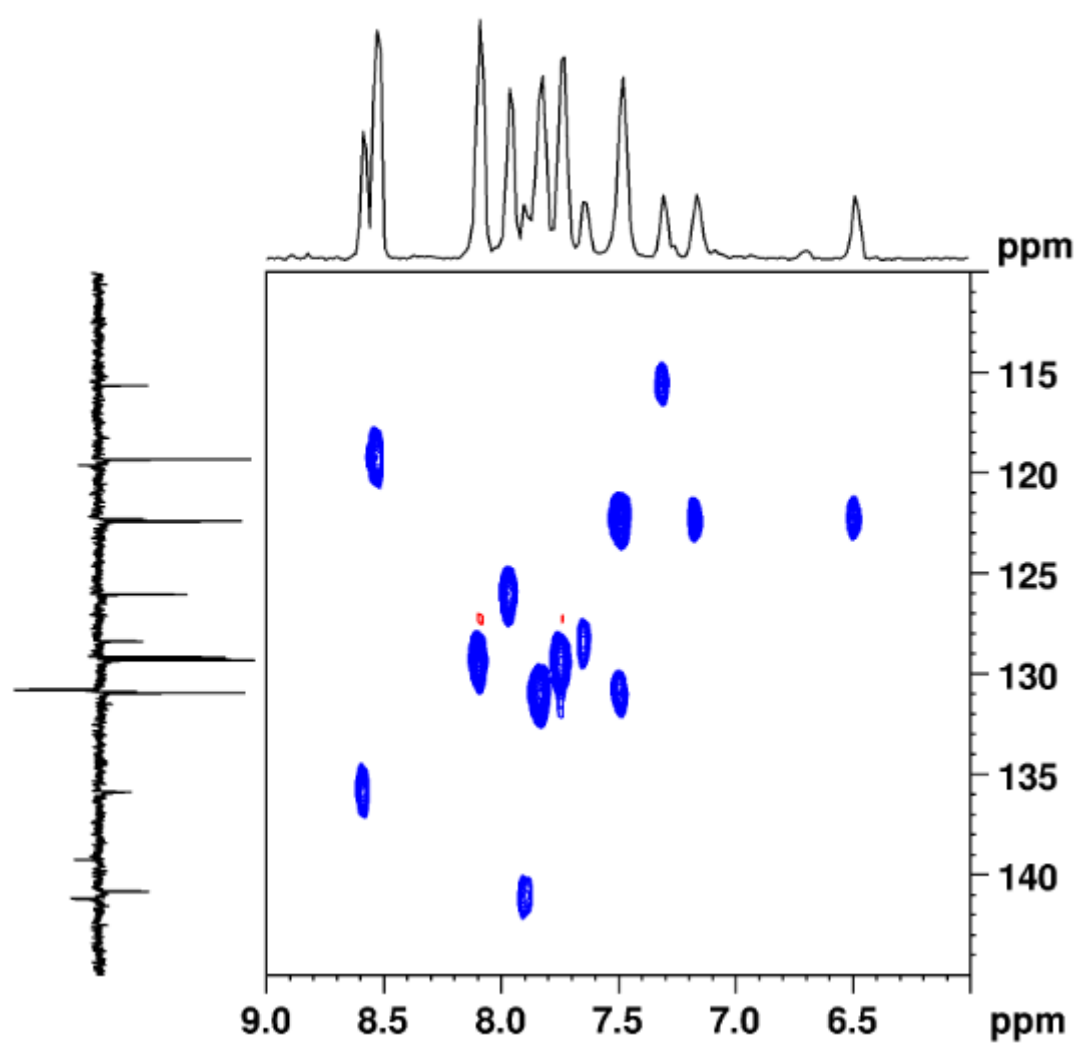

**Figure S10.** Amplified HSQC spectrum DMSO-d<sub>6</sub> of a TLC fraction from a quinoline oxidation reaction under Path II. Compounds **2b**, **2b\*** and **2c\*** were identified.

### 3. NMR spectra of a quinoline total reaction mixture

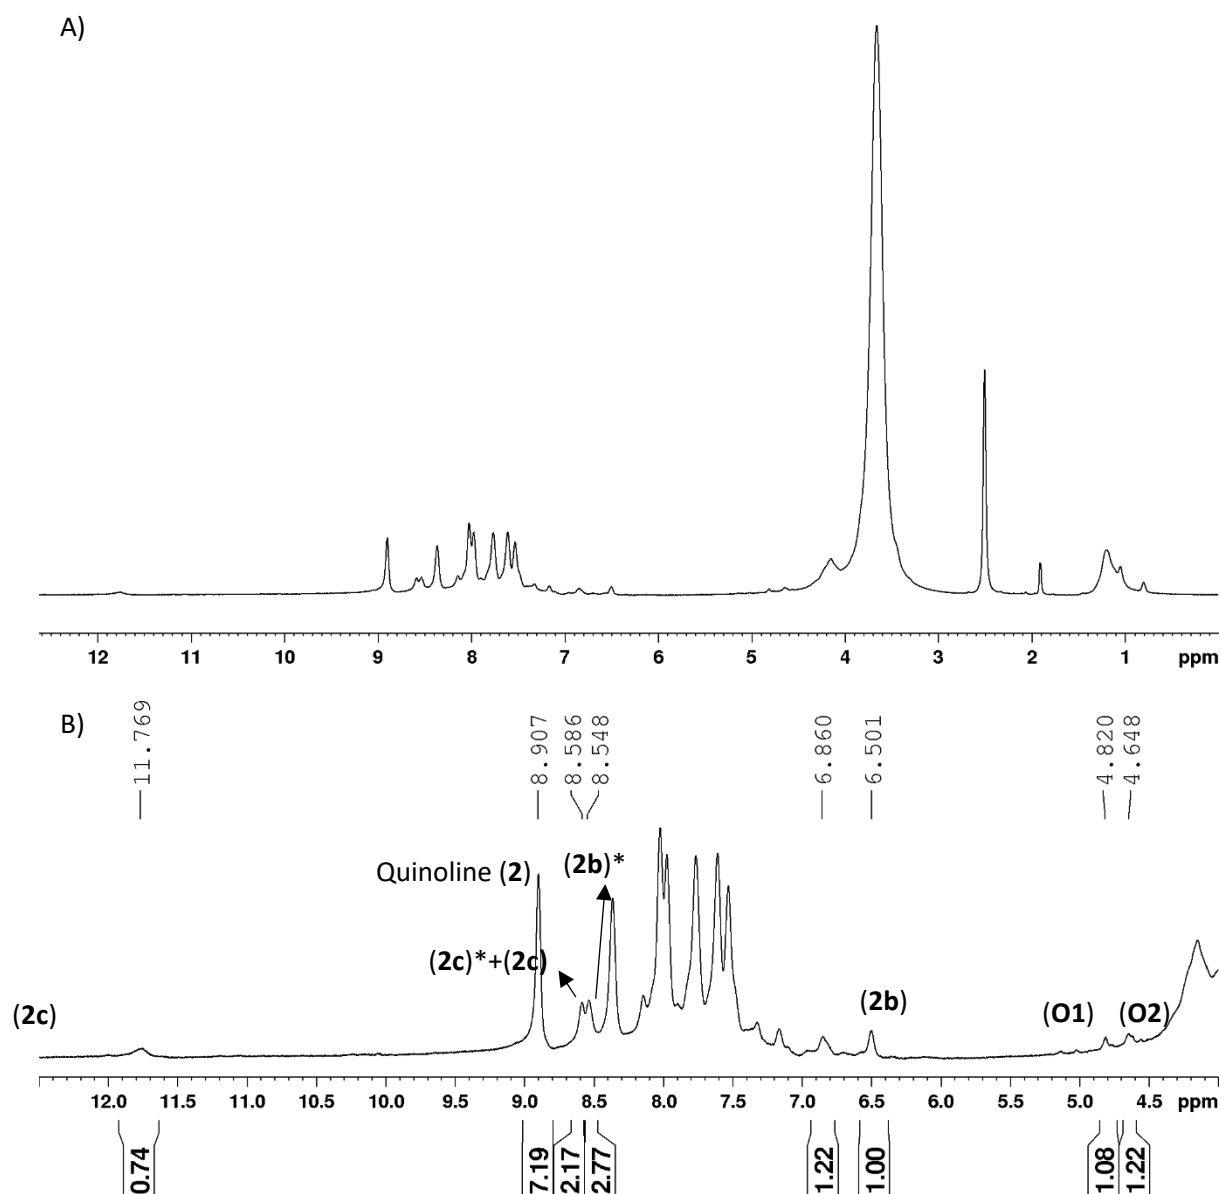

**Figure S11.** A) Full and B) amplified  $^1\text{H}$  spectrum of quinoline total reaction mixture in  $\text{DMSO-d}_6$ . The peaks used to quantify the individual products in the reaction mixture are marked: Quinoline (**2**) at  $\delta$  8.90 ppm (H-2); compound **2b** at  $\delta$  6.50 ppm (H-3, doublet with  $J=9.4$  Hz typical of H-*cis* from double bonds, coupling with peak at  $\delta$  7.91 ppm); Compound **2b**\* at  $\delta$  8.55 ppm (H-8); Compound **2c** at  $\delta$  11.7 ppm (OH); Compound **2c**\* at  $\delta$  8.60 ppm (H-2, doublet with  $J=4.8$  Hz coupling with OH, minus the area of compound **2c**); Others (**O**) include  $\delta$  6.85 ppm ascribed to an intermediate product and  $\delta$  4.82 ppm (coupling with peak at  $\delta$  4.19 ppm, similarly to compound **2a**);.

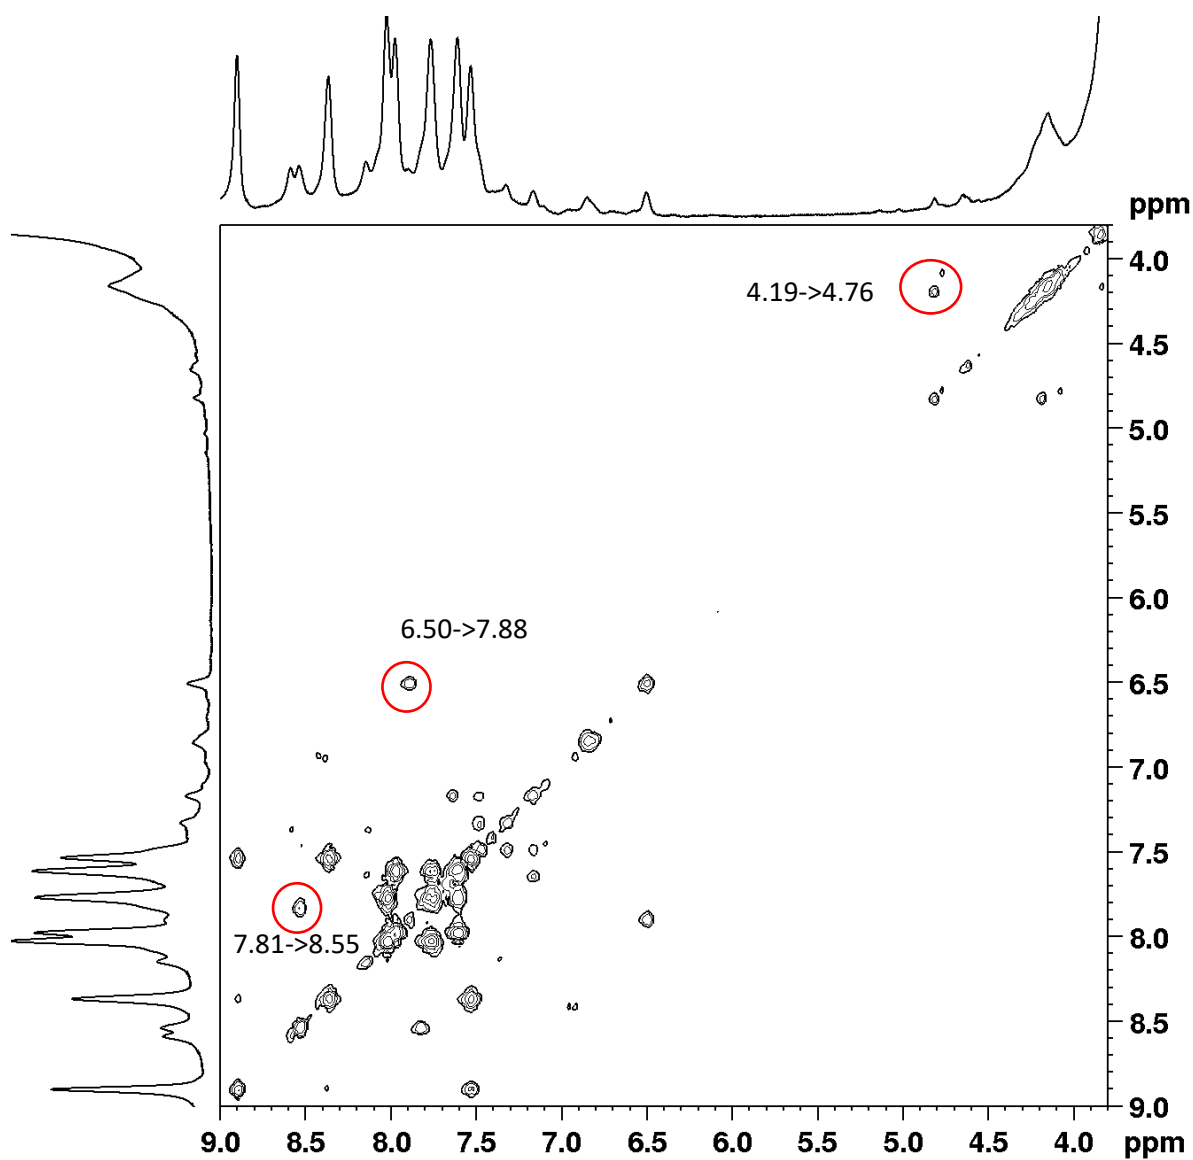

**Figure S12.** Amplified COSY spectrum in DMSO-d<sub>6</sub> of reaction mixture from a quinoline oxidation reaction under Path II.

## 4. Additional characterization of acridine products

### 4.1. Compound **3a** and **3b**

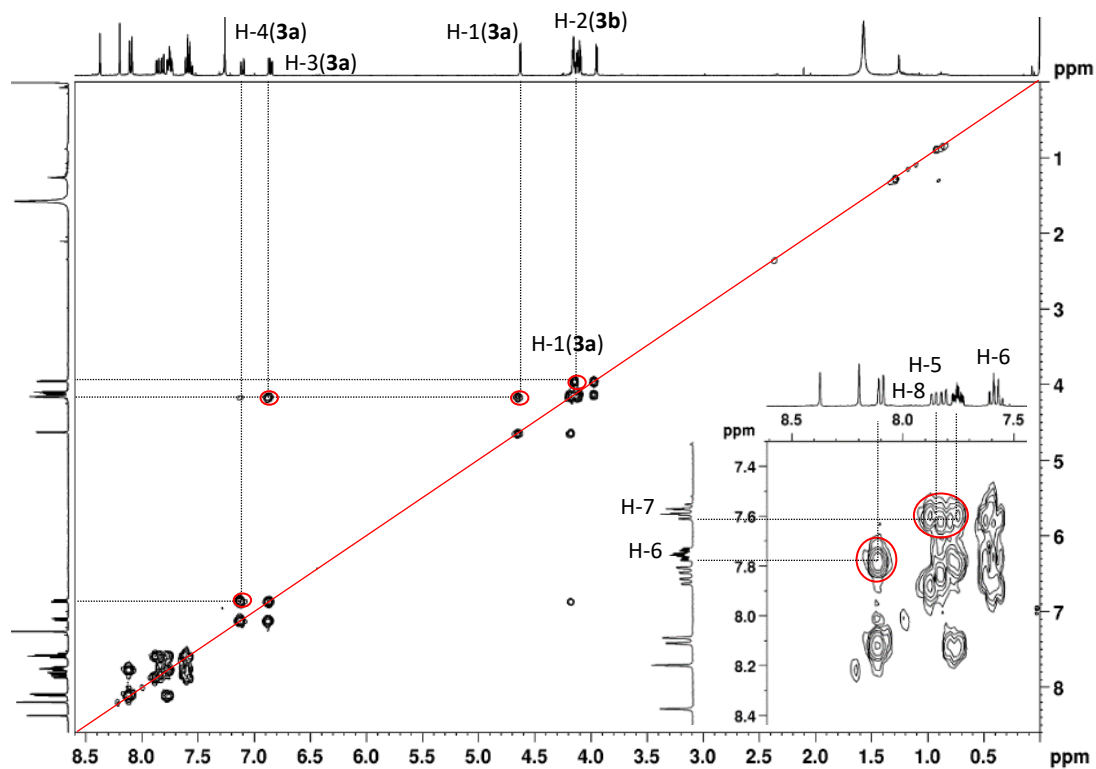

**Figure S13.** COSY spectrum from a fraction containing a mixture of products **3a** and **3b** in CDCl<sub>3</sub>.

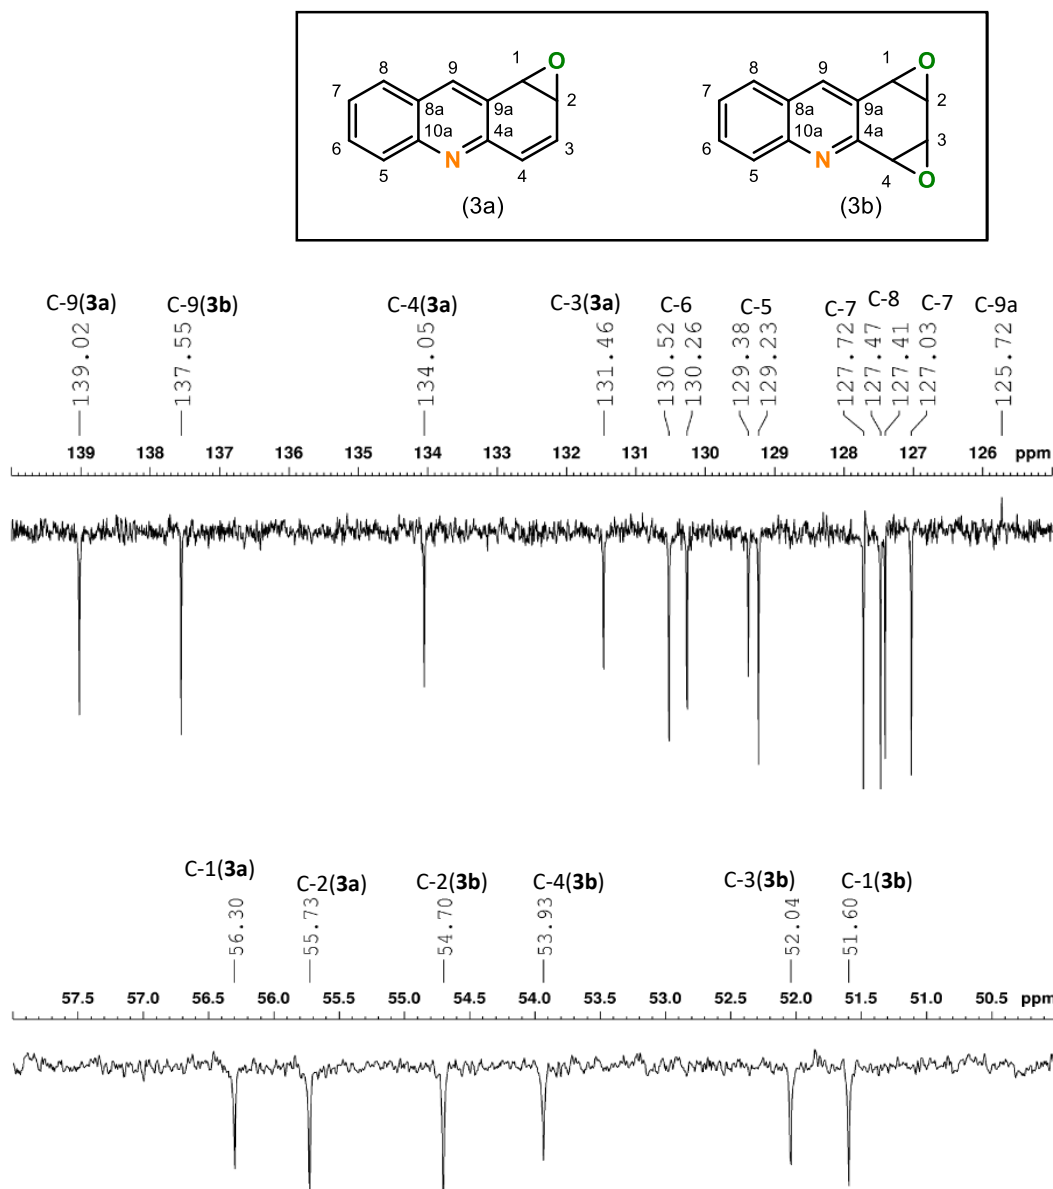

**Figure S14.** APT spectrum from a fraction containing a mixture of products **3a** and **3b** in  $\text{CDCl}_3$ .

5. Catalyst stability studies

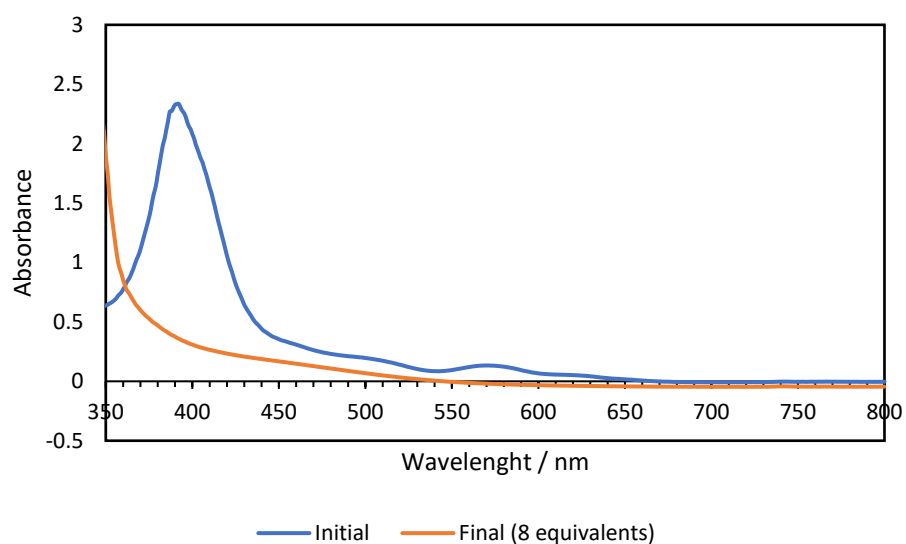

**Figure S15.** UV-vis of quinoline reaction mixture in  $\text{CHCl}_3$ . The bands observed in the initial spectrum are from the catalyst  $[\text{Fe}(\text{TPFPP})\text{Cl}]$ . The Soret band is observed at  $\sim 400$  nm.

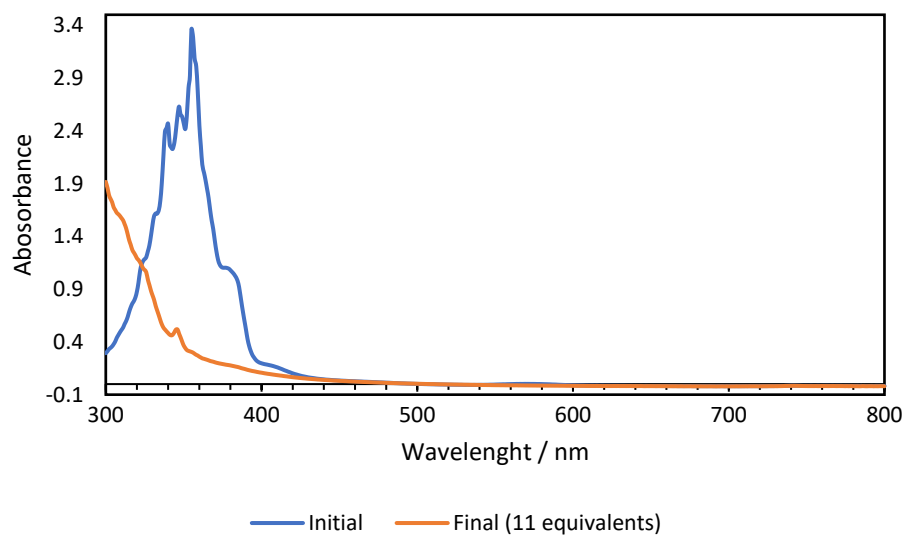

**Figure S16.** UV-vis of acridine reaction mixture in  $\text{CHCl}_3$ . The bands observed in the initial spectrum are from acridine (more intense bands) and the catalyst  $[\text{Fe}(\text{TPFPP})\text{Cl}]$  (Soret band at 410 nm).
